# Supplementary material for: Diagnosis of schistosomiasis japonica with interfacial co-assembly-based multi-channel electrochemical immunosensor arrays
Source: PubMed Central journal article supplement — Sci Rep. 2013 May 7;3:1789. doi: 10.1038/srep01789 (PMC3646279; doi:10.1038/srep01789), 2013-05-07
Supplement: srep01789-s1.pdf [file srep01789-s1.pdf]

Supplemental Data for

**Diagnosis of schistosomiasis japonica with interfacial co-assembly-  
based multi-channel electrochemical immunosensor arrays**

Wangping Deng<sup>1</sup>, Bin Xu<sup>2</sup>, Haiyan Hu<sup>1</sup>, Jianyong Li<sup>1</sup>, Wei Hu<sup>2\*</sup>, Shiping Song<sup>1\*</sup>,  
Zheng Feng<sup>2\*</sup>, Chunhai Fan<sup>1\*</sup>

**This file includes**

**Figure s1-s8**

**Table s1**

**Figure s1.** A portable in-house built 16-channel electrochemical detector (ECH16) connected to a laptop.

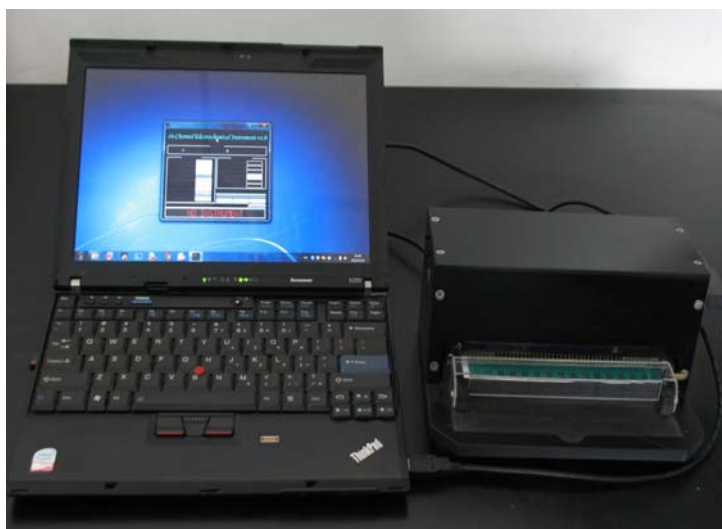

**Figure s2.** Construction of disposable in-house built 16-channel SPCE array. Each consisting of a carbon working electrode (3 mm diameter), a carbon auxiliary electrode, and an Ag/AgCl reference electrode; the insulating layer printed around the working area constituting a reservoir of electrochemical microcell.

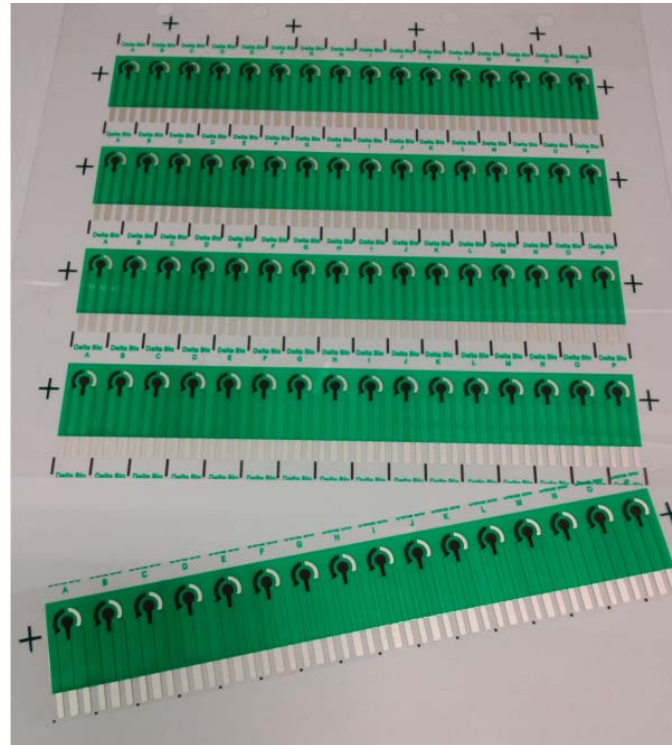

**Figure s3.** The CV curve of ferricyanatum kalium redox activity on SPCE array with ECH16. The CV measurement was performed at the presence of 5mM  $K_3 [Fe (CN)_6]$  in 0.1M KCL by running 2 segments in a potential range from -0.5 to 0.6 V at the scan rate of 0.1 V/s.

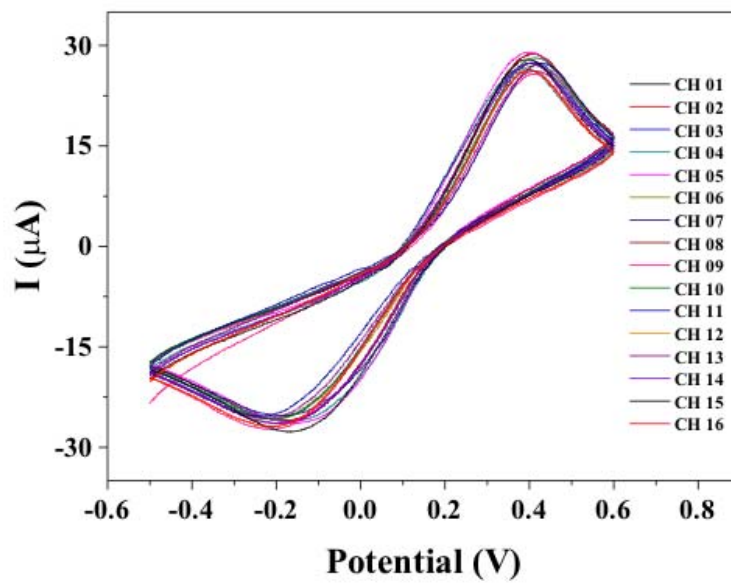

**Figure s4.** The CV curve and I-T curve in TMB containing H<sub>2</sub>O<sub>2</sub>. (A) CV curve and (B) I-T curve of TMB on 16 bare SPCE array with ECH16. The scan voltage for CV: -0.3 ~0.6 V, the scan rate: 0.1 V/S, The scan voltage for I-T: -0.1 V.

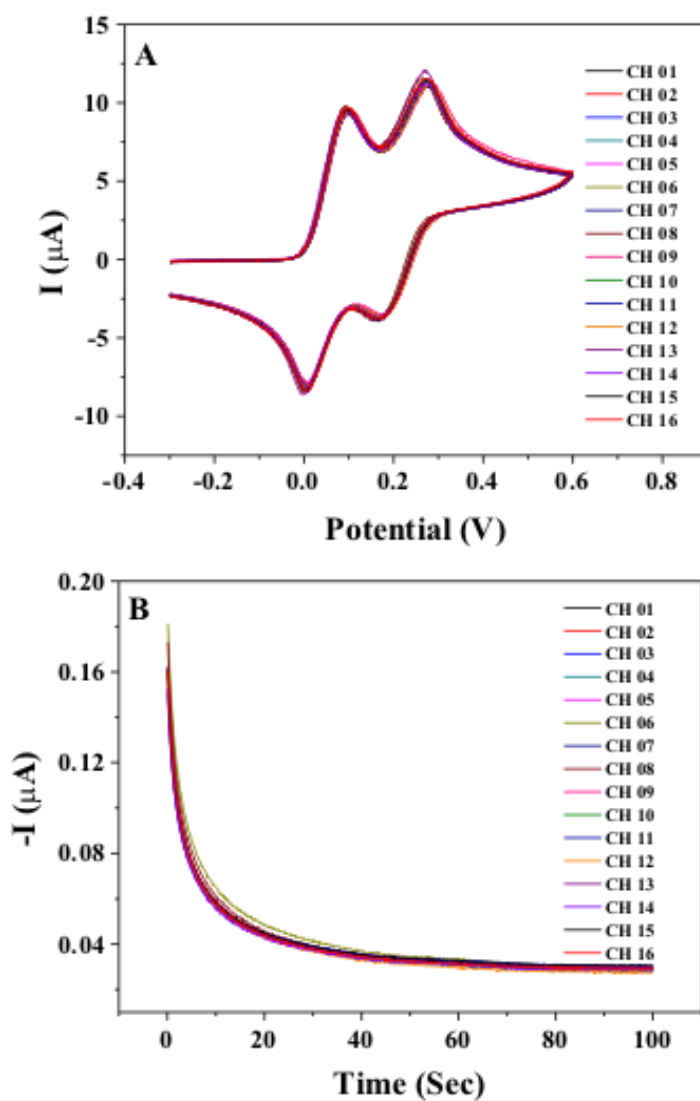

**Figure s5.** The CV curve of electrochemical activation of 16-channel SPCE array with ECH16. The inset shows the CV curve of electrochemical activation of channel 17. Electrochemical activation was performed in a 0.01M phosphate buffer (pH 7.2) by running 10 cycles of CV with potential range from -0.3 to 0.6 V at the scan rate of 0.5 V/s.

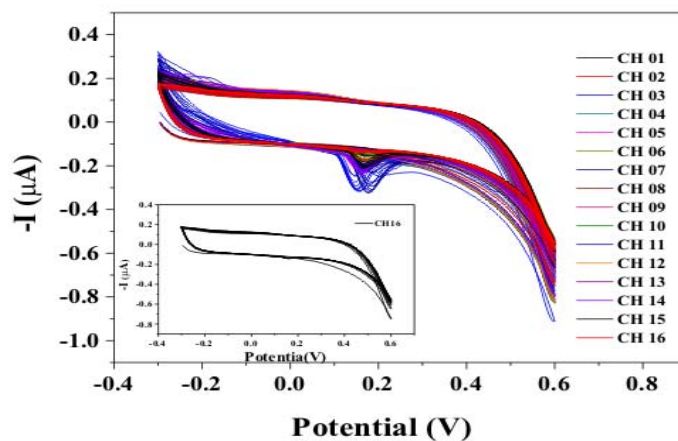

**Figure s6.** The stability evaluation of the ECISA. Amperometric read (A) and P/N ratio (B) of the array measured during the 16-day storage time at 37 °C.

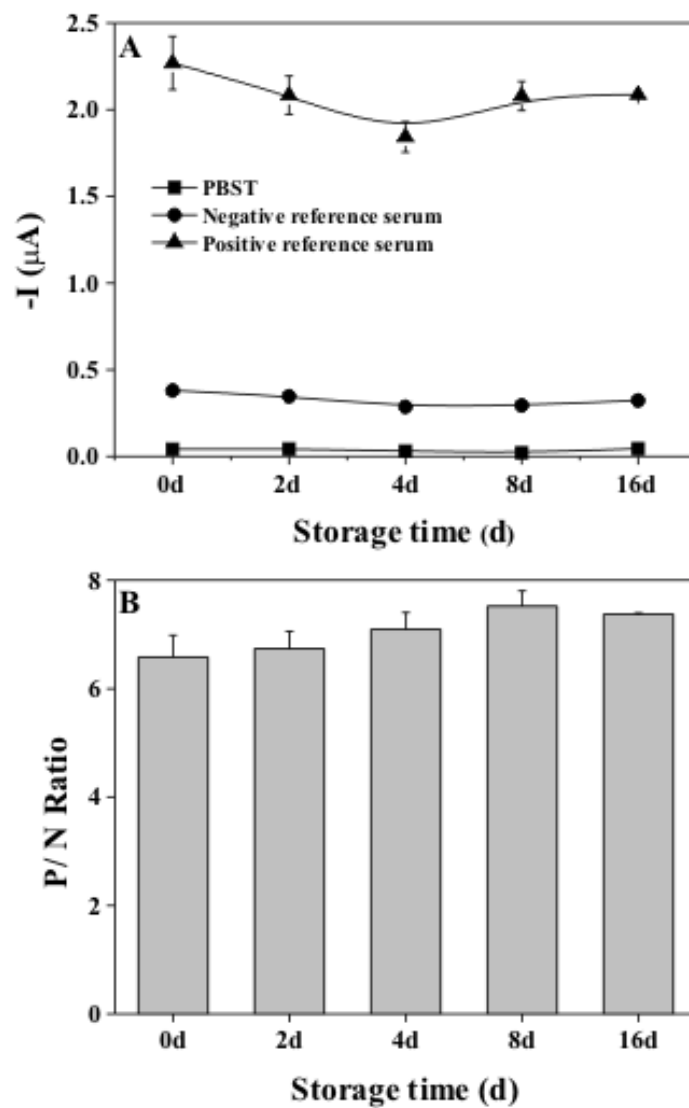

**Figure s7.** The dose-response curve of ECISA. Insert: The partitioned calibration curve ( $y=5581.96-1693.16x$ ,  $R^2=0.999$ )

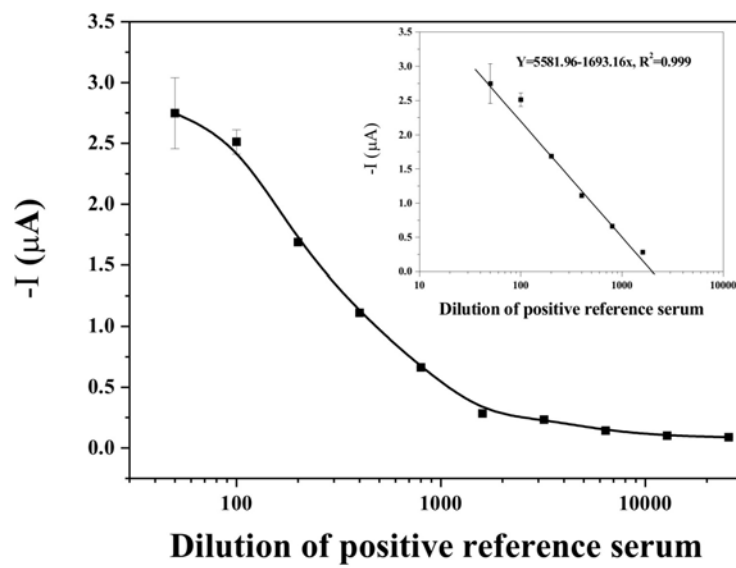



**Figure s8.** Control experiments on different quantitative ratios of SjE16/SEA. SjE16: 250ng; SEA 120ng (2:1), 60ng (4:1), 30ng (8:1), 15ng (16:1), 7.5ng (32:1), 3.375ng (64:1).

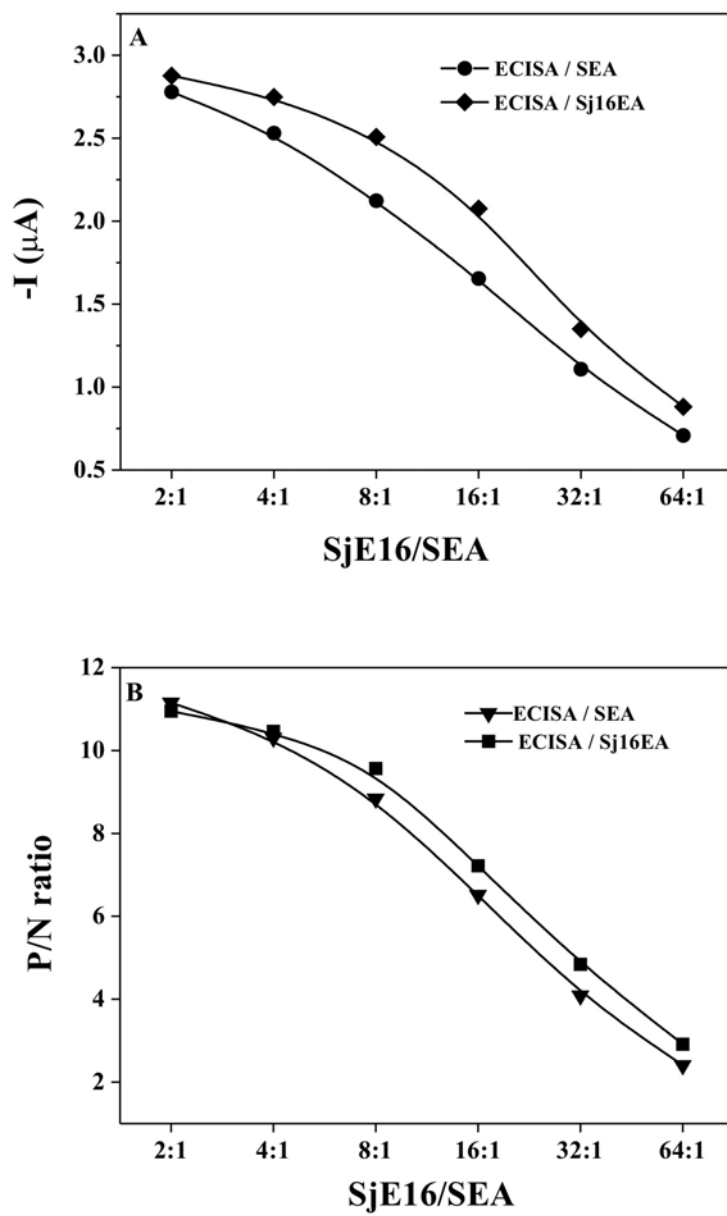

**Table s1.** The statistic results of the sensitivity, specificity and cross reactivity in Sj diagnosis by ECISA / Sj16EA and in-house ELISA / SEA or commercial ELISA kit.

| Group studied (no.) and criterion assessed | Test results (%) |            |            |            |           |
|--------------------------------------------|------------------|------------|------------|------------|-----------|
|                                            | ECISA /Sj16EA    |            |            | ELISA /SEA | ELISA kit |
|                                            | COV(1:100)       | COV(1:125) | COV(1:150) |            |           |
| <b>Sensitivity</b>                         |                  |            |            |            |           |
| S. japonica (35)                           | 94.3             | 97.1       | 100        | 97.1       | 97.1      |
| <b>Specificity</b>                         |                  |            |            |            |           |
| Normal human control (15)                  | 100              | 100        | 93.3       | 93.3       | 100       |
| <b>Cross-reactivity</b>                    |                  |            |            |            |           |
| Clonorchiasis ( 5)                         | 0                | 0          | 0          | 0          | 20        |
| Trichinosis (9)                            | 11               | 11         | 11         | 22.2       | 33.3      |
| Cysticercosis (10)                         | 0                | 0          | 0          | 10         | 60        |
| Paragonimiasis (7)                         | 28.6             | 42.9       | 85.7       | 71.4       | 100       |
